# Supplementary material
Source: publisher figshare collection journal article supplement (https://sage.figshare.com/ndownloader/files/13058708)
Supplement: Supplementary file 1 [file 13058708]

| **Sensory-pain** | **Disability** | **Neutral** |
| --- | --- | --- |
| Tension | Bedroom | Setting |
| Pounding | Disorder | Boarding |
| Pressing | Terminal | Inclined |
| Splitting | Dependent | Promotion |
| Piercing | Unstable | Animated |
| Drilling | Handicap | Compound |
| Tight | Wound | Grasp |
| Pulsing | Disable | Banking |
| Squeeze | Invalid | Trailer |

Supplementary Table 1.

*Sensory-pain, disability, and neutral words used in the cognitive bias tasks*
